# Supplementary material
Source: MDPI journal article supplement (https://www.mdpi.com/2313-0105/8/12/265)
Supplement: s1 [file s1]

Supporting Information

Table S1. Average electrolytes' thickness used for ionic conductivity calculations.

| Electrolyte | Thickness (cm)    |
|-------------|-------------------|
| CMC-CS sw   | $0.28 \pm 0.09$   |
| CA30 sw     | $0.31 \pm 0.0001$ |
| CA40 sw     | $0.36 \pm 0.05$   |
| CA50 sw     | $0.35 \pm 0.05$   |

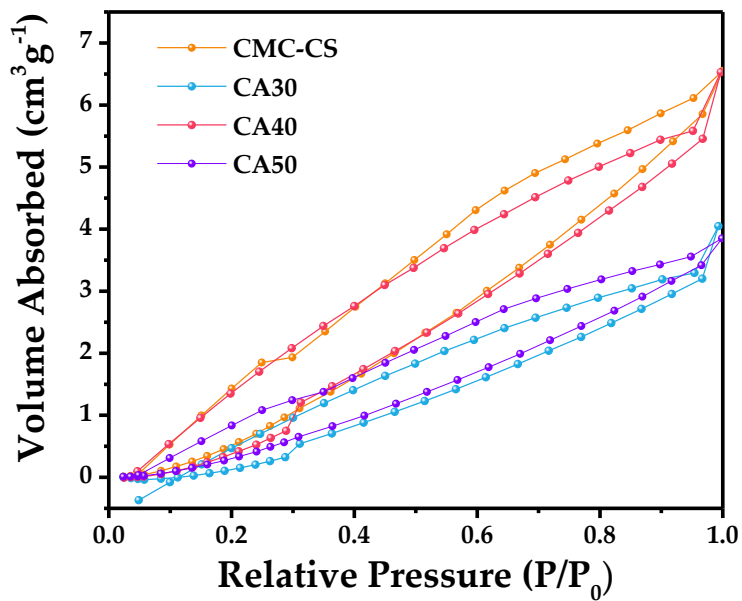

Figure S1. Nitrogen adsorption/desorption isotherms for the synthesized hydrogels.

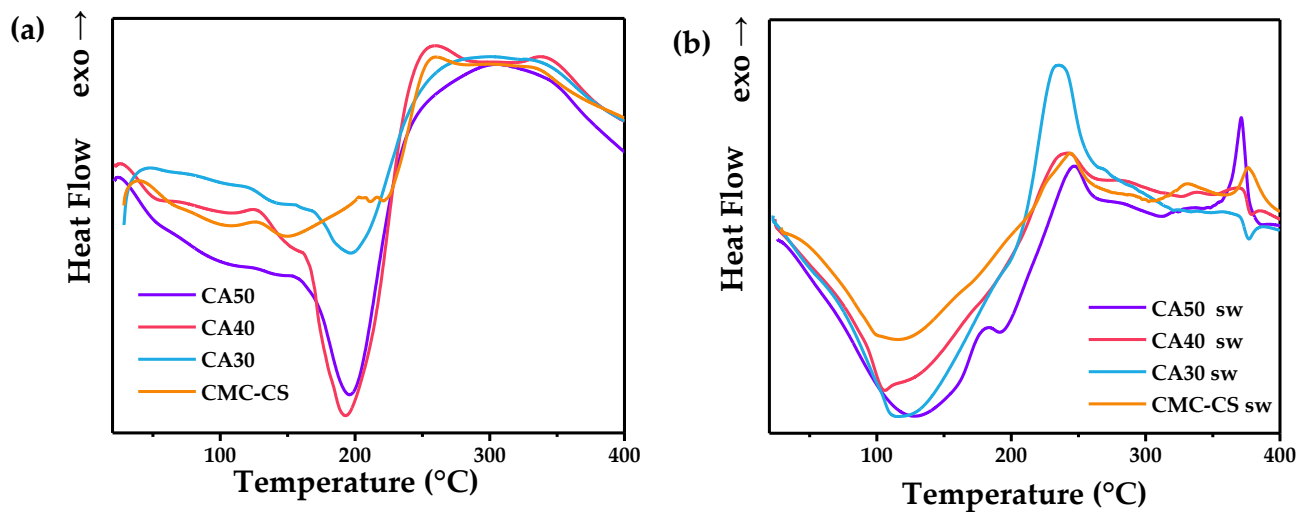

Figure S2. DSC curves for (a) dried hydrogels and (b) swollen hydrogels.
